# Supplementary material for: Screening of Relevant Metabolism-Disrupting Chemicals on Pancreatic β-Cells: Evaluation of Murine and Human In Vitro Models
Source: MDPI journal article supplement (doi:10.3390/ijms23084182), 2022-04-10
Supplement: s1 [file s1]

## SUPPLEMENTARY MATERIAL

# Screening of Relevant Metabolism-Disrupting Chemicals on Pancreatic $\beta$ -Cells: Evaluation of Murine and Human In Vitro Models

Ruba Al-Abdulla <sup>1</sup>, Hilda Ferrero <sup>1,2</sup>, Sergi Soriano <sup>1,3</sup>, Talía Boronat-Belda <sup>1</sup> and Paloma Alonso-Magdalena <sup>1,2,\*</sup>

- <sup>1</sup> Instituto de Investigación, Desarrollo e Innovación en Biotecnología Sanitaria de Elche (IDiBE),  
Universidad Miguel Hernández, 03202 Elche, Spain; ral@umh.es (R.A.-A.);  
hferrero@umh.es (H.F.);  
sergi.soriano@ua.es (S.S.); tboronat@umh.es (T.B.-B.)
- <sup>2</sup> Centro de Investigación Biomédica en Red de Diabetes y Enfermedades Metabólicas Asociadas (CIBERDEM), 28029 Madrid, Spain
- <sup>3</sup> Departamento de Fisiología, Genética y Microbiología, Universidad de Alicante, 03690 Alicante, Spain
- \* Correspondence: palonso@umh.es. Paloma Alonso-Magdalena, Instituto de Investigación, Desarrollo e Innovación en Biotecnología Sanitaria de Elche (IDiBE), Universidad Miguel Hernández de Elche, 03202-Elche, Spain.

**A**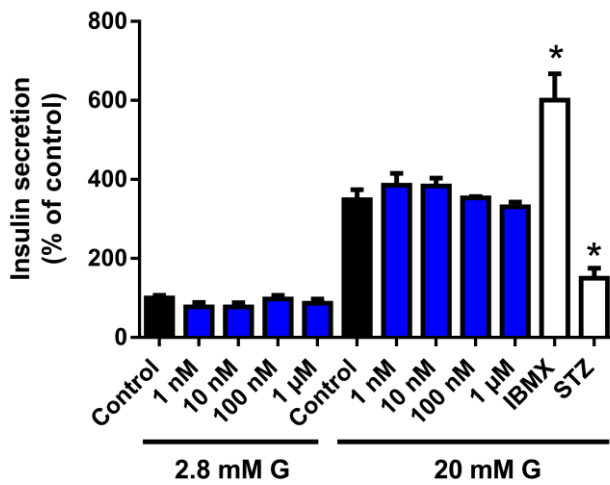**B**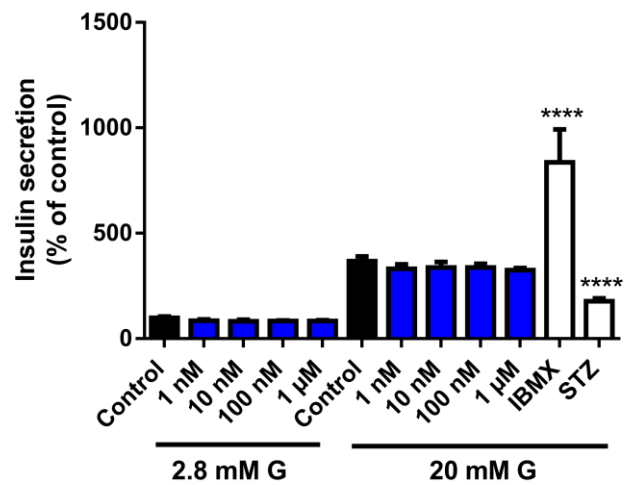

**Supplemental Figure S1.** Glucose-stimulated insulin secretion (GSIS) in EndoC-βH1 cells treated with BPA (1 nM–1 μM) for 24 h (A) or 48 h (B). n = two independent experiments (A), n = three independent experiments (B). \* vs. Control 20 mM G; \*p < 0.05, \*\*\*\*p < 0.0001, one-way ANOVA followed by Dunnet's post hoc test. All data are expressed as mean ± SEM.

**A**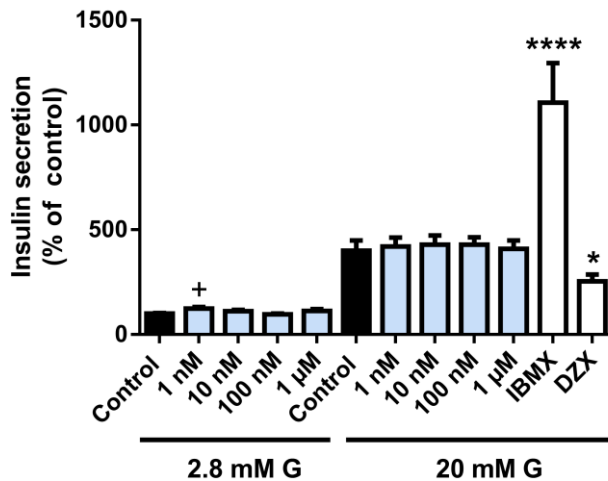**B**

| 24 h       | Resazurin       | Neutral red     | CFDA-AM       |
|------------|-----------------|-----------------|---------------|
| Control    | 100.0 ± 0.5     | 100.0 ± 1.6     | 100.0 ± 2.3   |
| BPF 1 nM   | 98.4 ± 0.6      | 102.3 ± 1.9     | 98.4 ± 2.1    |
| BPF 10 nM  | 96.1 ± 1.0 *    | 104.6 ± 1.9     | 94.9 ± 2.1    |
| BPF 100 nM | 94.0 ± 1.3 ***  | 107.1 ± 2.0     | 90.4 ± 2.3 ** |
| BPF 1 μM   | 91.2 ± 1.2 **** | 109.5 ± 3.0 **  | 92.5 ± 2.5 *  |
| 48 h       | Resazurin       | Neutral red     | CFDA-AM       |
| Control    | 100.0 ± 0.5     | 100.0 ± 1.7     | 100.0 ± 1.6   |
| BPF 1 nM   | 96.2 ± 0.8      | 103.1 ± 1.3     | 95.5 ± 1.8    |
| BPF 10 nM  | 93.2 ± 0.4 ***  | 104.2 ± 2.1     | 99.8 ± 2.0    |
| BPF 100 nM | 87.9 ± 1.2 **** | 106.7 ± 1.6 *   | 94.0 ± 1.6    |
| BPF 1 μM   | 90.0 ± 1.2 **** | 106.0 ± 0.9 *   | 94.2 ± 2.6    |
| 72 h       | Resazurin       | Neutral red     | CFDA-AM       |
| Control    | 100.0 ± 0.7     | 100.0 ± 1.2     | 100.0 ± 1.6   |
| BPF 1 nM   | 99.8 ± 0.7      | 106.0 ± 1.6 *   | 94.7 ± 2.9    |
| BPF 10 nM  | 98.8 ± 1.2      | 108.5 ± 1.8 *** | 98.2 ± 3.1    |
| BPF 100 nM | 96.6 ± 1.0      | 106.2 ± 1.7 *   | 94.6 ± 2.5    |
| BPF 1 μM   | 94.5 ± 1.2 ***  | 105.4 ± 1.1 *   | 96.3 ± 2.2    |

**Supplemental Figure S2.** (A) GSIS in EndoC-βH1 cells treated with BPF (1 nM–1 μM) for 72 h. n = three independent experiments. + vs. Control 2.8 mM G and \* vs. Control 20 mM G; +p < 0.05, \*p < 0.05, \*\*\*\*p < 0.0001, one-way ANOVA followed by Dunnet's post hoc test. (B) Viability of EndoC-βH1 cells treated for 72 h with different BPF concentrations (1 nM–1 μM) as evaluated by RZ, NR and CFDA-AM assays. n = four independent experiments. \* vs. Control; \*p < 0.05, \*\*p < 0.01, \*\*\*p < 0.001 and

\*\*\*\* $p < 0.0001$ , one-way ANOVA followed by Dunnet's post hoc test or Kruskal-Wallis followed by Dunn's post hoc test. All data are expressed as mean  $\pm$  SEM.

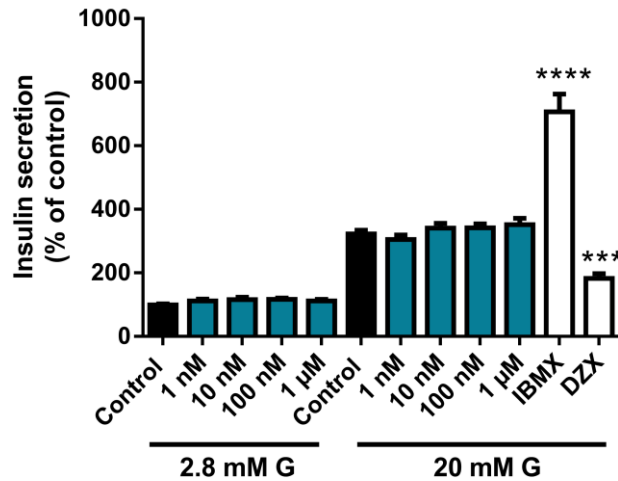

**Supplemental Figure S3.** GSIS in EndoC- $\beta$ H1 cells treated with DEHP (1 nM–1  $\mu$ M) for 72 h.  $n =$  six independent experiments. \* vs. Control 20 mM G; \*\*\* $p < 0.001$ , \*\*\*\* $p < 0.0001$ , one-way ANOVA followed by Dunnet's post hoc test. All data are expressed as mean  $\pm$  SEM.

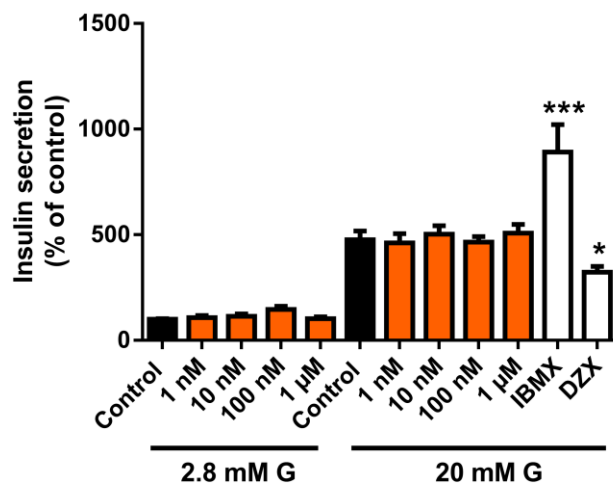

**Supplemental Figure S4.** GSIS in EndoC- $\beta$ H1 cells treated with DDE (1 nM–1  $\mu$ M) for 72 h.  $n =$  three independent experiments. \* vs. Control 20 mM G; \* $p < 0.05$ , \*\*\* $p < 0.001$ , ANOVA one way followed by Dunnet's post hoc test. All data are expressed as mean  $\pm$  SEM.

| MIN6        |                 |                 |                 |                          |                 |                 |                 |
|-------------|-----------------|-----------------|-----------------|--------------------------|-----------------|-----------------|-----------------|
| 48 h        | Resazurin       | Neutral red     | CFDA-AM         | 48 h                     | Resazurin       | Neutral red     | CFDA-AM         |
| Control     | 100.0 ± 0.9     | 100.0 ± 0.9     | 100.0 ± 0.8     | Control                  | 100.0 ± 1.9     | 100.0 ± 0.8     | 100.0 ± 0.7     |
| BPA 100 pM  | 93.5 ± 1.4 *    | 99.9 ± 1.1      | 96.0 ± 1.0      | BPS 100 pM               | 90.6 ± 2.8 *    | 93.3 ± 1.5 ***  | 96.5 ± 1.7      |
| BPA 1 nM    | 86.4 ± 2.3 **** | 100.5 ± 1.3     | 90.2 ± 1.6 **** | BPS 1 nM                 | 89.0 ± 3.3 *    | 96.8 ± 1.3      | 96.6 ± 1.2      |
| BPA 10 nM   | 87.7 ± 1.6 **** | 93.3 ± 1.8      | 92.4 ± 1.2 ***  | BPS 10 nM                | 89.2 ± 3.1 *    | 96.3 ± 1.0      | 95.1 ± 1.3 *    |
| BPA 100 nM  | 89.7 ± 1.5 ***  | 100.7 ± 1.3     | 94.4 ± 1.4 *    | BPS 100 nM               | 89.6 ± 2.9 *    | 97.5 ± 1.1      | 94.9 ± 1.2 *    |
| BPA 1 μM    | 85.6 ± 2.2 **** | 85.1 ± 3.2 *    | 88.1 ± 1.2 **** | BPS 1 μM                 | 87.0 ± 2.6 **   | 96.6 ± 1.0      | 92.9 ± 1.1 ***  |
| BPA 10 μM   | 87.4 ± 3.4 **   | 100.1 ± 1.6     | 92.0 ± 1.5 **** | BPS 10 μM                | 84.1 ± 2.3 **** | 89.9 ± 1.4 **** | 93.0 ± 1.2 ***  |
| 72 h        | Resazurin       | Neutral red     | CFDA-AM         | 72 h                     | Resazurin       | Neutral red     | CFDA-AM         |
| Control     | 100.0 ± 1.2     | 100.0 ± 1.2     | 100.0 ± 0.7     | Control                  | 100.0 ± 2.0     | 100.0 ± 0.7     | 100.0 ± 1.1     |
| BPA 100 pM  | 89.3 ± 2.8 *    | 92.4 ± 3.7      | 94.4 ± 1.6 *    | BPS 100 pM               | 97.3 ± 2.3      | 100.5 ± 0.9     | 98.1 ± 1.2      |
| BPA 1 nM    | 94.1 ± 2.0      | 103.9 ± 2.0     | 98.2 ± 1.2      | BPS 1 nM                 | 92.6 ± 2.3      | 101.3 ± 0.9     | 94.6 ± 1.3*     |
| BPA 10 nM   | 78.2 ± 1.9 **** | 85.3 ± 2.3 **   | 88.4 ± 1.2 **** | BPS 10 nM                | 90.9 ± 2.4 *    | 99.9 ± 1.1      | 94.3 ± 1.4**    |
| BPA 100 nM  | 103.8 ± 2.0     | 116.0 ± 2.5 **  | 102.3 ± 0.9     | BPS 100 nM               | 92.2 ± 2.1      | 102.9 ± 1.0     | 94.8 ± 1.3*     |
| BPA 1 μM    | 96.2 ± 2.7      | 107.5 ± 3.6     | 96.3 ± 1.5      | BPS 1 μM                 | 94.3 ± 2.1      | 102.5 ± 1.1     | 95.2 ± 1.2*     |
| BPA 10 μM   | 82.8 ± 3.1 **** | 83.9 ± 3.5 **   | 88.9 ± 1.8 **** | BPS 10 μM                | 93.7 ± 2.1      | 99.9 ± 1.7      | 95.2 ± 1.3*     |
| 48 h        | Resazurin       | Neutral red     | CFDA-AM         | 48 h                     | Resazurin       | Neutral red     | CFDA-AM         |
| Control     | 100.0 ± 1.1     | 100.0 ± 1.0     | 100.0 ± 0.9     | Control                  | 100.0 ± 3.0     | 100.0 ± 0.7     | 100.0 ± 4.2     |
| PFOS 100 pM | 91.9 ± 1.9 **   | 93.4 ± 1.9 *    | 95.6 ± 1.5 *    | CdCl <sub>2</sub> 100 pM | 92.6 ± 1.6      | 87.1 ± 3.8      | 91.5 ± 3.5      |
| PFOS 1 nM   | 94.4 ± 1.8 *    | 93.5 ± 2.5 **   | 99.7 ± 2.0      | CdCl <sub>2</sub> 1 nM   | 83.3 ± 3.5 **   | 71.1 ± 2.1 **** | 86.7 ± 2.7      |
| PFOS 10 nM  | 89.2 ± 1.2 **** | 83.9 ± 2.1 **** | 94.5 ± 0.9 **   | CdCl <sub>2</sub> 10 nM  | 83.9 ± 3.2 *    | 83.3 ± 3.2      | 86.1 ± 3.0      |
| PFOS 100 nM | 92.9 ± 1.5 **   | 96.8 ± 1.9      | 97.4 ± 1.0      | CdCl <sub>2</sub> 100 nM | 80.2 ± 2.5 **   | 72.1 ± 3.3 ***  | 78.2 ± 5.0 *    |
| PFOS 1 μM   | 83.7 ± 2.5 **** | 82.7 ± 1.7 **** | 86.9 ± 1.8 **** | CdCl <sub>2</sub> 1 μM   | 63.4 ± 2.4 **** | 56.2 ± 2.7 **** | 57.9 ± 3.5 **** |
| PFOS 10 μM  | 95.0 ± 1.1      | 92.7 ± 1.1 *    | 94.8 ± 1.4 **   | CdCl <sub>2</sub> 10 μM  | 9.7 ± 2.3 ****  | 2.2 ± 0.9 ****  | 17.1 ± 3.6 **** |
| 72 h        | Resazurin       | Neutral red     | CFDA-AM         | 72 h                     | Resazurin       | Neutral red     | CFDA-AM         |
| Control     | 100.0 ± 1.7     | 100.0 ± 2.3     | 100.0 ± 0.9     | Control                  | 100.0 ± 1.8     | 100.0 ± 0.6     | 100.0 ± 1.3     |
| PFOS 100 pM | 97.6 ± 2.3      | 100.9 ± 2.2     | 97.3 ± 1.2      | CdCl <sub>2</sub> 100 pM | 92.2 ± 2.0      | 95.9 ± 0.8 *    | 95.3 ± 1.2      |
| PFOS 1 nM   | 95.6 ± 2.3      | 101.3 ± 2.2     | 96.2 ± 1.2      | CdCl <sub>2</sub> 1 nM   | 88.5 ± 2.3 **   | 92.1 ± 0.8 **** | 94.2 ± 1.5      |
| PFOS 10 nM  | 94.2 ± 2.5      | 97.3 ± 2.4      | 96.8 ± 1.2      | CdCl <sub>2</sub> 10 nM  | 89.5 ± 2.2 *    | 91.9 ± 0.8 **** | 94.0 ± 1.4      |
| PFOS 100 nM | 97.3 ± 2.6      | 101.7 ± 2.8     | 96.6 ± 1.3      | CdCl <sub>2</sub> 100 nM | 91.1 ± 2.3      | 92.3 ± 1.2 **** | 94.1 ± 1.5      |
| PFOS 1 μM   | 97.3 ± 2.1      | 99.8 ± 2.3      | 96.8 ± 1.1      | CdCl <sub>2</sub> 1 μM   | 86.9 ± 2.7 **   | 90.1 ± 1.4 **** | 92.4 ± 1.6 **   |
| PFOS 10 μM  | 102.3 ± 2.3     | 101.0 ± 2.8     | 98.5 ± 1.1      | CdCl <sub>2</sub> 10 μM  | 0 ± 0.3 ****    | 53.2 ± 1.4 **** | 10.8 ± 0.4 **** |
| 48 h        | Resazurin       | Neutral red     | CFDA-AM         | 48 h                     | Resazurin       | Neutral red     | CFDA-AM         |
| Control     | 100.0 ± 1.6     | 100.0 ± 1.0     | 100.0 ± 1.0     | Control                  | 100.0 ± 0.9     | 100.0 ± 0.8     | 100.0 ± 1.0     |
| DEHP 100 pM | 95.8 ± 1.9      | 99.0 ± 1.4      | 96.7 ± 1.5      | DDE 100 pM               | 95.6 ± 1.3      | 102.9 ± 1.5     | 97.0 ± 1.5      |
| DEHP 1 nM   | 94.1 ± 2.0      | 97.8 ± 1.0      | 96.7 ± 1.3      | DDE 1 nM                 | 95.6 ± 1.5      | 100.9 ± 2.3     | 95.9 ± 1.2      |
| DEHP 10 nM  | 92.9 ± 2.2      | 94.1 ± 1.3 **   | 95.5 ± 1.7      | DDE 10 nM                | 85.4 ± 1.8 **** | 89.1 ± 1.9 **   | 93.5 ± 1.6 **   |
| DEHP 100 nM | 94.1 ± 2.2      | 99.6 ± 1.4      | 96.0 ± 1.4      | DDE 100 nM               | 94.4 ± 1.3 *    | 101.2 ± 1.8     | 99.9 ± 1.4      |
| DEHP 1 μM   | 91.3 ± 2.5 *    | 93.5 ± 1.2 **   | 94.7 ± 1.4 *    | DDE 1 μM                 | 91.1 ± 1.4 ***  | 95.2 ± 1.5      | 96.1 ± 1.3      |
| DEHP 10 μM  | 92.5 ± 3.5      | 79.5 ± 1.7 **** | 83.2 ± 3.2 **** | DDE 10 μM                | 77.4 ± 4.1 **** | 79.5 ± 4.5 **** | 87.6 ± 2.2 ***  |
| 72 h        | Resazurin       | Neutral red     | CFDA-AM         | 72 h                     | Resazurin       | Neutral red     | CFDA-AM         |
| Control     | 100.0 ± 1.6     | 100.0 ± 1.7     | 100.0 ± 1.4     | Control                  | 100.0 ± 1.7     | 100.0 ± 1.0     | 100.0 ± 1.1     |
| DEHP 100 pM | 94.3 ± 1.9      | 96.2 ± 1.8      | 93.6 ± 0.9 **   | DDE 100 pM               | 99.5 ± 3.7      | 111.4 ± 2.7 *   | 99.1 ± 1.6      |
| DEHP 1 nM   | 95.4 ± 1.6      | 99.0 ± 2.0      | 95.3 ± 1.0 *    | DDE 1 nM                 | 94.4 ± 4.1      | 106.8 ± 2.8     | 96.6 ± 2.0      |
| DEHP 10 nM  | 93.3 ± 1.9 *    | 96.8 ± 1.4      | 95.2 ± 1.0 *    | DDE 10 nM                | 96.5 ± 4.7      | 113.5 ± 3.0 **  | 97.9 ± 2.3      |
| DEHP 100 nM | 95.3 ± 1.7      | 99.2 ± 2.1      | 96.8 ± 0.9      | DDE 100 nM               | 94.5 ± 5.0      | 113.9 ± 3.2 **  | 96.9 ± 2.4      |
| DEHP 1 μM   | 88.6 ± 2.2 ***  | 90.7 ± 1.9 **   | 94.6 ± 1.0 *    | DDE 1 μM                 | 93.5 ± 4.5      | 109.1 ± 2.6     | 95.1 ± 2.1      |
| DEHP 10 μM  | 59.1 ± 3.7 **** | 47.1 ± 2.9 **** | 65.9 ± 3.3 **** | DDE 10 μM                | 40.7 ± 2.4 *    | 82.4 ± 6.2      | 69.9 ± 5.1 *    |

**Supplemental Table S1.** Viability of MIN6 cells treated for 48 or 72 h with different BPA, BPS, CdCl<sub>2</sub>, PFOS, DDE or DEHP concentrations (100 pM–10 μM) as evaluated by RZ, NR and CFDA-AM assays. n= at least three independent experiments. \* vs. Control; \*p < 0.05, \*\*p < 0.01, \*\*\*p < 0.001 and \*\*\*\*p < 0.0001, one-way ANOVA followed by Dunnett's post hoc test or Kruskal-Wallis followed by Dunn's post hoc test. All data are expressed as mean ± SEM.

| EndoC-βH1   |               |                  |                 |                          |                 |                  |               |
|-------------|---------------|------------------|-----------------|--------------------------|-----------------|------------------|---------------|
| 24 h        | Resazurin     | Neutral red      | CFDA-AM         | 24 h                     | Resazurin       | Neutral red      | CFDA-AM       |
| Control     | 100.0 ± 0.5   | 100.0 ± 2.0      | 100.0 ± 0.8     | Control                  | 100.0 ± 1.0     | 100.0 ± 1.2      | 100.0 ± 0.7   |
| BPA 1 nM    | 100.0 ± 1.5   | 103.5 ± 1.8      | 98.3 ± 2.0      | BPS 1 nM                 | 103.8 ± 1.4     | 104.4 ± 1.8      | 102.8 ± 1.3   |
| BPA 10 nM   | 99.1 ± 1.4    | 104.3 ± 1.5      | 99.0 ± 1.3      | BPS 10 nM                | 105.4 ± 1.2 *   | 107.5 ± 2.0 *    | 104.4 ± 1.3   |
| BPA 100 nM  | 98.3 ± 1.3    | 104.2 ± 2.2      | 97.9 ± 1.1      | BPS 100 nM               | 102.7 ± 1.6     | 101.3 ± 3.2      | 104.7 ± 2.4   |
| BPA 1 μM    | 96.2 ± 1.4    | 103.5 ± 2.8      | 96.2 ± 1.3      | BPS 1 μM                 | 95.9 ± 1.9      | 98.4 ± 1.2       | 95.7 ± 1.6    |
| 48 h        | Resazurin     | Neutral red      | CFDA-AM         | 72 h                     | Resazurin       | Neutral red      | CFDA-AM       |
| Control     | 100.0 ± 0.9   | 100.0 ± 1.8      | 100.0 ± 1.2     | Control                  | 100.0 ± 0.9     | 100.0 ± 1.5      | 100.0 ± 0.7   |
| BPA 1 nM    | 100.4 ± 0.5   | 106.9 ± 1.2      | 99.3 ± 0.8      | BPS 1 nM                 | 100.7 ± 1.5     | 105.0 ± 2.5      | 98.7 ± 2.1    |
| BPA 10 nM   | 98.3 ± 1.0    | 105.6 ± 2.0      | 97.1 ± 1.1      | BPS 10 nM                | 99.2 ± 2.3      | 103.3 ± 2.4      | 99.4 ± 1.9    |
| BPA 100 nM  | 96.1 ± 1.4    | 104.6 ± 2.3      | 94.7 ± 1.5 *    | BPS 100 nM               | 104.3 ± 1.8     | 110.9 ± 2.9 **   | 100.4 ± 2.5   |
| BPA 1 μM    | 94.9 ± 1.5 ** | 98.1 ± 3.4       | 93.1 ± 1.5 ***  | BPS 1 μM                 | 97.5 ± 1.8      | 97.0 ± 1.5       | 95.1 ± 1.2    |
| 24 h        | Resazurin     | Neutral red      | CFDA-AM         | 24 h                     | Resazurin       | Neutral red      | CFDA-AM       |
| Control     | 100.0 ± 0.4   | 100.0 ± 1.5      | 100.0 ± 0.8     | Control                  | 100.0 ± 0.8     | 100.0 ± 0.8      | 100.0 ± 1.3   |
| PFOS 1 nM   | 99.4 ± 0.7    | 104.6 ± 1.3 *    | 99.0 ± 0.9      | CdCl <sub>2</sub> 1 nM   | 99.7 ± 1.3      | 101.2 ± 1.4      | 99.6 ± 1.7    |
| PFOS 10 nM  | 98.0 ± 0.8    | 108.5 ± 1.1 **** | 95.4 ± 1.2      | CdCl <sub>2</sub> 10 nM  | 98.5 ± 1.5      | 102.3 ± 1.8      | 102.5 ± 1.6   |
| PFOS 100 nM | 97.4 ± 0.6 *  | 106.8 ± 0.9 **   | 94.4 ± 1.4 *    | CdCl <sub>2</sub> 100 nM | 98.5 ± 1.5      | 101.7 ± 1.7      | 103.9 ± 2.2   |
| PFOS 1 μM   | 98.3 ± 0.8    | 107.3 ± 1.5 ***  | 92.8 ± 2.1 ***  | CdCl <sub>2</sub> 1 μM   | 97.2 ± 0.9      | 97.7 ± 1.7       | 102.7 ± 3.1   |
| 48 h        | Resazurin     | Neutral red      | CFDA-AM         | 48 h                     | Resazurin       | Neutral red      | CFDA-AM       |
| Control     | 100.0 ± 0.3   | 100.0 ± 0.9      | 100.0 ± 0.9     | Control                  | 100.0 ± 0.4     | 100.0 ± 0.5      | 100.0 ± 1.0   |
| PFOS 1 nM   | 98.7 ± 0.5    | 107.5 ± 0.7 **** | 102.2 ± 1.7     | CdCl <sub>2</sub> 1 nM   | 95.6 ± 0.8 **   | 101.2 ± 1.0      | 101.1 ± 1.1   |
| PFOS 10 nM  | 96.8 ± 0.8 ** | 111.3 ± 1.1 **** | 98.8 ± 1.7      | CdCl <sub>2</sub> 10 nM  | 93.0 ± 1.2 **** | 102.5 ± 1.4      | 103.1 ± 1.6   |
| PFOS 100 nM | 98.1 ± 0.9    | 105.9 ± 1.2 ***  | 96.9 ± 2.0      | CdCl <sub>2</sub> 100 nM | 92.1 ± 1.2 **** | 102.7 ± 1.8      | 101.6 ± 1.8   |
| PFOS 1 μM   | 99.3 ± 0.7    | 107.0 ± 1.5 **** | 92.8 ± 2.1      | CdCl <sub>2</sub> 1 μM   | 96.3 ± 0.7 *    | 99.7 ± 1.5       | 103.0 ± 2.5   |
| 24 h        | Resazurin     | Neutral red      | CFDA-AM         | 24 h                     | Resazurin       | Neutral red      | CFDA-AM       |
| Control     | 100.0 ± 0.3   | 100.0 ± 1.0      | 100.0 ± 1.4     | Control                  | 100.0 ± 0.6     | 100.0 ± 0.9      | 100.0 ± 1.0   |
| DEHP 1 nM   | 98.8 ± 0.6    | 103.4 ± 1.5      | 100.8 ± 1.9     | DDE 1 nM                 | 98.4 ± 0.7      | 100.8 ± 1.2      | 99.4 ± 0.7    |
| DEHP 10 nM  | 98.3 ± 0.7    | 103.9 ± 1.1      | 101.7 ± 1.7     | DDE 10 nM                | 97.5 ± 0.8      | 101.9 ± 1.2      | 97.4 ± 0.8    |
| DEHP 100 nM | 97.0 ± 0.8 *  | 102.5 ± 1.2      | 98.2 ± 1.5      | DDE 100 nM               | 95.5 ± 0.7 ***  | 99.7 ± 1.1       | 95.4 ± 1.2 ** |
| DEHP 1 μM   | 98.6 ± 1.2    | 100.1 ± 2.1      | 93.5 ± 2.2 *    | DDE 1 μM                 | 94.5 ± 1.2 **** | 96.9 ± 1.1       | 95.7 ± 0.9 ** |
| 48 h        | Resazurin     | Neutral red      | CFDA-AM         | 48 h                     | Resazurin       | Neutral red      | CFDA-AM       |
| Control     | 100.0 ± 0.4   | 100.0 ± 0.8      | 100.0 ± 1.5     | Control                  | 100.0 ± 0.6     | 100.0 ± 0.4      | 100.0 ± 0.9   |
| DEHP 1 nM   | 100.1 ± 1.1   | 102.9 ± 0.7      | 98.3 ± 2.3      | DDE 1 nM                 | 100.7 ± 0.9     | 104.8 ± 0.9 ***  | 100.6 ± 1.0   |
| DEHP 10 nM  | 99.3 ± 0.9    | 107.4 ± 1.8 *    | 106.7 ± 2.8     | DDE 10 nM                | 96.8 ± 1.6      | 106.2 ± 0.6 **** | 95.5 ± 1.6    |
| DEHP 100 nM | 97.5 ± 0.7    | 106.9 ± 1.6 *    | 98.3 ± 1.1      | DDE 100 nM               | 96.7 ± 1.4      | 104.6 ± 0.7 ***  | 97.6 ± 1.8    |
| DEHP 1 μM   | 101.7 ± 0.9   | 100.1 ± 2.8      | 85.9 ± 2.4 **** | DDE 1 μM                 | 96.5 ± 0.9 *    | 95.3 ± 1.2 ***   | 94.8 ± 1.5 *  |
| 72 h        | Resazurin     | Neutral red      | CFDA-AM         | 72 h                     | Resazurin       | Neutral red      | CFDA-AM       |
| Control     | 100.0 ± 0.6   | 100.0 ± 1.5      | 100.0 ± 1.0     | Control                  | 100.0 ± 1.1     | 100.0 ± 1.4      | 100.0 ± 1.0   |
| DEHP 1 nM   | 95.3 ± 1.2 *  | 102.5 ± 1.9      | 91.7 ± 1.6 **   | DDE 1 nM                 | 98.9 ± 1.7      | 100.6 ± 2.5      | 100.0 ± 1.9   |
| DEHP 10 nM  | 99.5 ± 0.8    | 104.8 ± 2.1      | 100.3 ± 2.5     | DDE 10 nM                | 99.4 ± 1.8      | 103.6 ± 2.5      | 100.0 ± 1.8   |
| DEHP 100 nM | 98.5 ± 0.6    | 105.6 ± 2.1      | 98.1 ± 2.5      | DDE 100 nM               | 100.3 ± 1.1     | 103.2 ± 2.0      | 100.7 ± 1.7   |
| DEHP 1 μM   | 99.4 ± 1.4    | 98.3 ± 3.2       | 85.4 ± 3.0 ***  | DDE 1 μM                 | 97.4 ± 0.8      | 96.7 ± 1.6       | 96.5 ± 1.5    |

**Supplemental Table S2.** Viability of EndoC-βH1 cells treated for 24, 48 or 72 h with different BPA, BPS, CdCl<sub>2</sub>, PFOS, DDE or DEHP concentrations (1 nM–1 μM) as evaluated by RZ, NR and CFDA-AM assays. n= at least four independent experiments. \* vs. Control; \*p < 0.05, \*\*p < 0.01, \*\*\*p < 0.001 and \*\*\*\*p < 0.0001, one-way ANOVA followed by Dunnet's post hoc test or Kruskal-Wallis followed by Dunn's post hoc test. All data are expressed as mean ± SEM.

|           | GEN           | FORWARD                | REVERSE                    | REFSEQ    |
|-----------|---------------|------------------------|----------------------------|-----------|
|           |               | (5'→3')                | (5'→3')                    |           |
| MIN6      | <i>Ins</i>    | TTATTGTTTCAACATGGCCC   | CAAAGGTGCTGCTTGACAAA       | 001185083 |
|           | <i>Pdx1</i>   | GGCCTGGAAGAGCCCAACCG   | TGTGTAAGCACCTCCTGCCCACT    | 008814    |
|           | <i>Hnf4a</i>  | TCTGGATGACCAGGTGGCGCT  | GGACACACGGCTCATCTCCGC      | 008261    |
|           | <i>MafA</i>   | CCCGTCTTGGCCCTCCATGATT | TATCCCGCCGTGTCTGTGTGG      | 194350    |
|           | <i>Kir6.2</i> | CCCGTCTTGGCCCTCCATGATT | TATCCCGCCGTGTCTGTGTGG      | 010602    |
|           | <i>Sur1</i>   | TGCCTCAGGACAAGCAACC    | GACCACTGTCTCTTGTATC        | 011510    |
|           | <i>Glut2</i>  | ATCGCTCCAACCACACTCAG   | CTGAGGCCAGCAATCTGACTA      | 031197    |
|           | <i>Gck</i>    | TTCAGCTTCTGGCCTCCACAG  | AAAACAGCCAGGTCTGGGCAGC     | 010292    |
|           | <i>Hprt</i>   | GGTTAAGCAGTACAGCCCCA   | TCCAACACTTCGAGAGGTCC       | 013556    |
|           | <i>Actb</i>   | GGCTGTATTCCCCTCCATCG   | CCAGTTGGTAACAATGCCATGT     | 007393    |
| EndoC-βHI | <i>INS</i>    | AAGCAGATCACTGTCTTC     | ACACTAGGTAGAGAGCTTCC       | 000207    |
|           | <i>PDX1</i>   | CCTTTCCCATGGATGAAGTC   | CGAACTCCTTCTCCAGCTCTA      | 000209    |
|           | <i>HNF4a</i>  | CGAAGGTCAAGCTATGAGGACA | ATCTGCGATGCTGGCAATCT       | 178849    |
|           | <i>MAFA</i>   | TTCTCCTTGTACAGGTCCCG   | GAGAGCGAGAAGTGCCAACT       | 201589    |
|           | <i>MAFB</i>   | AAGCCTCTCACCTAGGAGC    | GGAAAACAGATCCTCCCCTC       | 005461    |
|           | <i>KIR6.2</i> | AGGTCCAAGTGAATATTGGCT  | TCTGCACGATGAGGATCAGGA      | 000525    |
|           | <i>SUR1</i>   | TCGTGAATCTGCTGTCCAAAG  | CGATGGCTCGCAAGTCGAT        | 001287174 |
|           | <i>SNAP25</i> | TCGTGTAGTGGACGAACGG    | TCTCATTGCCCATATCCAGGG      | 003081    |
|           | <i>GLUT1</i>  | TCTGGCATCAACGCTGTCTTC  | CGATACCGGAGCCAATGGT        | 006516    |
|           | <i>GCK</i>    | TGCTACTACGAAGACCATCAGT | CCACTCGGTATTGACGCACA       | 000162    |
|           | <i>HPRT1</i>  | GCCCTGGCGTCGTGATTAGT   | AGCAAGACGTTTCACTCTGTCCATAA | 000194    |
|           | <i>ACTB</i>   | CACCATTGGCAATGAGCGGTTT | AGGTCTTTGCGGATGTCCACGT     | 001101    |

**Supplemental Table S3.** Primer sequences used in RT-qPCR for the study of pancreatic  $\beta$ -cell gene expression.
